# Supplementary material for: Multiferroic and Magnetodielectric Effects in Multiferroic Pr2FeAlO6 Double Perovskite
Source: MDPI journal article supplement (doi:10.3390/nano12173011), 2022-08-30
Supplement: s1 [file s1]

# Multiferroic and Magnetodielectric Effects in Multiferroic $\text{Pr}_2\text{FeAlO}_6$ Double Perovskite

Sheng Liu <sup>1</sup>, Feng Xiang <sup>1,\*</sup>, Yulan Cheng <sup>1</sup>, Yajun Luo <sup>1</sup> and Jing Sun <sup>2</sup>

**Table S1.** Rietveld refinement parameters of  $\text{Pr}_2\text{FeAlO}_6$  by GSAS.

| $\text{Pr}_2\text{FeAlO}_6$ | Parameters | Wyckoff | Element | $x$  | $y$  | $z$  |
|-----------------------------|------------|---------|---------|------|------|------|
| Crystal structure           | R3c        |         |         |      |      |      |
| Lattice a (Å)               | 5.511      | 6a      | Pr      | 0.33 | 0.67 | 0.41 |
| Lattice b (Å)               | 5.511      |         |         |      |      |      |
| Lattice c (Å)               | 13.067     |         |         |      |      |      |
| Volume (Å <sup>3</sup> )    | 343.839    | 3a      | Fe      | 0.67 | 0.33 | 0.31 |
| R factors $R_p$ (%)         | 3.55       |         |         |      |      |      |
| R factors $wR_p$ (%)        | 4.45       |         |         |      |      |      |
| R factors $\chi^2$ (%)      | 2.39       | 3b      | Al      | 0.33 | 0.67 | 0.16 |
| U                           | 1.113      |         |         |      |      |      |
| V                           | -1.427     |         |         |      |      |      |
| W                           | 4.413      | 18f     | O       | 0.68 | 0.90 | 0.07 |
| Temperature factor          | 0.013      |         |         |      |      |      |
